# Supplementary material for: A high-safety PVDF/Al2O3composite separator for Li-ion batteries via tip-induced electrospinning and dip-coating
Source: Royal Society of Chemistry journal article supplement (doi:10.1039/c7ra02681a), 2017-01-01
Supplement: c7ra02681a1.pdf [file c7ra02681a1.pdf]

Supplementary Table.1.

| Membrane separator                  | No. | Thickness | $M_p$  | $M_{BUOH}$ | Volume | P (%) | $\bar{P}$ (%) |
|-------------------------------------|-----|-----------|--------|------------|--------|-------|---------------|
| PVDF                                | 1   | 112       | 0.0107 | 0.0279     | 28.501 | 74.51 |               |
|                                     | 2   | 95        | 0.0061 | 0.0211     | 24.175 | 76.60 | 74.97         |
|                                     | 3   | 140       | 0.0115 | 0.0328     | 35.626 | 73.81 |               |
| PVDF/Al <sub>2</sub> O <sub>3</sub> | 1   | 167       | 0.0207 | 0.0401     | 42.496 | 56.36 |               |
|                                     | 2   | 116       | 0.0157 | 0.0289     | 29.518 | 55.21 | 55.84         |
|                                     | 3   | 111       | 0.0151 | 0.0279     | 28.246 | 55.95 |               |
| PP                                  | 1   | 40        | 0.0059 | 0.009      | 10.178 | 37.60 |               |
|                                     | 2   | 40        | 0.06   | 0.0092     | 10.178 | 38.81 | 39.22         |
|                                     | 3   | 40        | 0.0059 | 0.0093     | 10.178 | 41.24 |               |

$M_p$  and  $M_{BUOH}$  represent the masses of membrane before and after the n-butanol absorption, respectively.

Supplementary Table. 2.

| <b>Membrane separator</b>               | <b>No.</b> | <b><math>W_0</math></b> | <b>W</b> | <b>EU (%)</b> | <b><math>\bar{E}U</math> (%)</b> |
|-----------------------------------------|------------|-------------------------|----------|---------------|----------------------------------|
|                                         | 1          | 0.0077                  | 0.039    | 406.49        |                                  |
| <b>PVDF</b>                             | 2          | 0.0074                  | 0.0362   | 389.19        | 405.14                           |
|                                         | 3          | 0.0076                  | 0.0395   | 419.74        |                                  |
|                                         | 1          | 0.0168                  | 0.0428   | 154.76        |                                  |
| <b>PVDF/Al<sub>2</sub>O<sub>3</sub></b> | 2          | 0.0166                  | 0.0408   | 145.78        | 152.43                           |
|                                         | 3          | 0.0178                  | 0.0457   | 156.74        |                                  |
|                                         | 1          | 0.0108                  | 0.0173   | 60.1          |                                  |
| <b>PP</b>                               | 2          | 0.0121                  | 0.02     | 67.6          | 62.9                             |
|                                         | 3          | 0.0114                  | 0.0184   | 61            |                                  |

$W_0$  and  $W$  represent the masses of the dry membrane and wet electrolyte-filled membrane, respectively.
